# Supplementary material
Source: publisher site journal article supplement (https://www.dovepress.com/article/583174)
Supplement: Supplementary file 1 [file Supplementary%20file.pdf]

**Supplementary Table S1.** The number of carbapenemase-encoding genes in carbapenem-resistant *Citrobacter* spp. isolates

| <b>Isolates</b>              | <b><i>bla</i><sub>KPC</sub></b> | <b><i>bla</i><sub>NDM</sub></b> | <b><i>bla</i><sub>IMP</sub></b> | <b><i>bla</i><sub>VIM</sub></b> | <b><i>bla</i><sub>OXA-48</sub></b> | <b><i>bla</i><sub>KPC</sub>+<i>bla</i><sub>NDM</sub></b> | <b><i>bla</i><sub>KPC</sub>+<i>bla</i><sub>NDM</sub>+<i>bla</i><sub>OXA-48</sub></b> | <b><i>bla</i><sub>NDM</sub>+<i>bla</i><sub>OXA-48</sub></b> | <b><i>bla</i><sub>NDM</sub>+<i>bla</i><sub>VIM</sub></b> |
|------------------------------|---------------------------------|---------------------------------|---------------------------------|---------------------------------|------------------------------------|----------------------------------------------------------|--------------------------------------------------------------------------------------|-------------------------------------------------------------|----------------------------------------------------------|
| <i>C. freundii</i> (N=32)    | 4                               | 19                              | 1                               | 1                               | 1                                  | 3                                                        | 1                                                                                    | 1                                                           | 1                                                        |
| <i>C. koseri</i> (N=3)       | 3                               | 0                               | 0                               | 0                               | 0                                  | 0                                                        | 0                                                                                    | 0                                                           | 0                                                        |
| <i>C. braakii</i> (N=3)      | 0                               | 2                               | 0                               | 0                               | 0                                  | 1                                                        | 0                                                                                    | 0                                                           | 0                                                        |
| <i>C. amalonaticus</i> (N=2) | 0                               | 2                               | 0                               | 0                               | 0                                  | 0                                                        | 0                                                                                    | 0                                                           | 0                                                        |
| <i>C. youngae</i> (N=2)      | 1                               | 1                               | 0                               | 0                               | 0                                  | 0                                                        | 0                                                                                    | 0                                                           | 0                                                        |

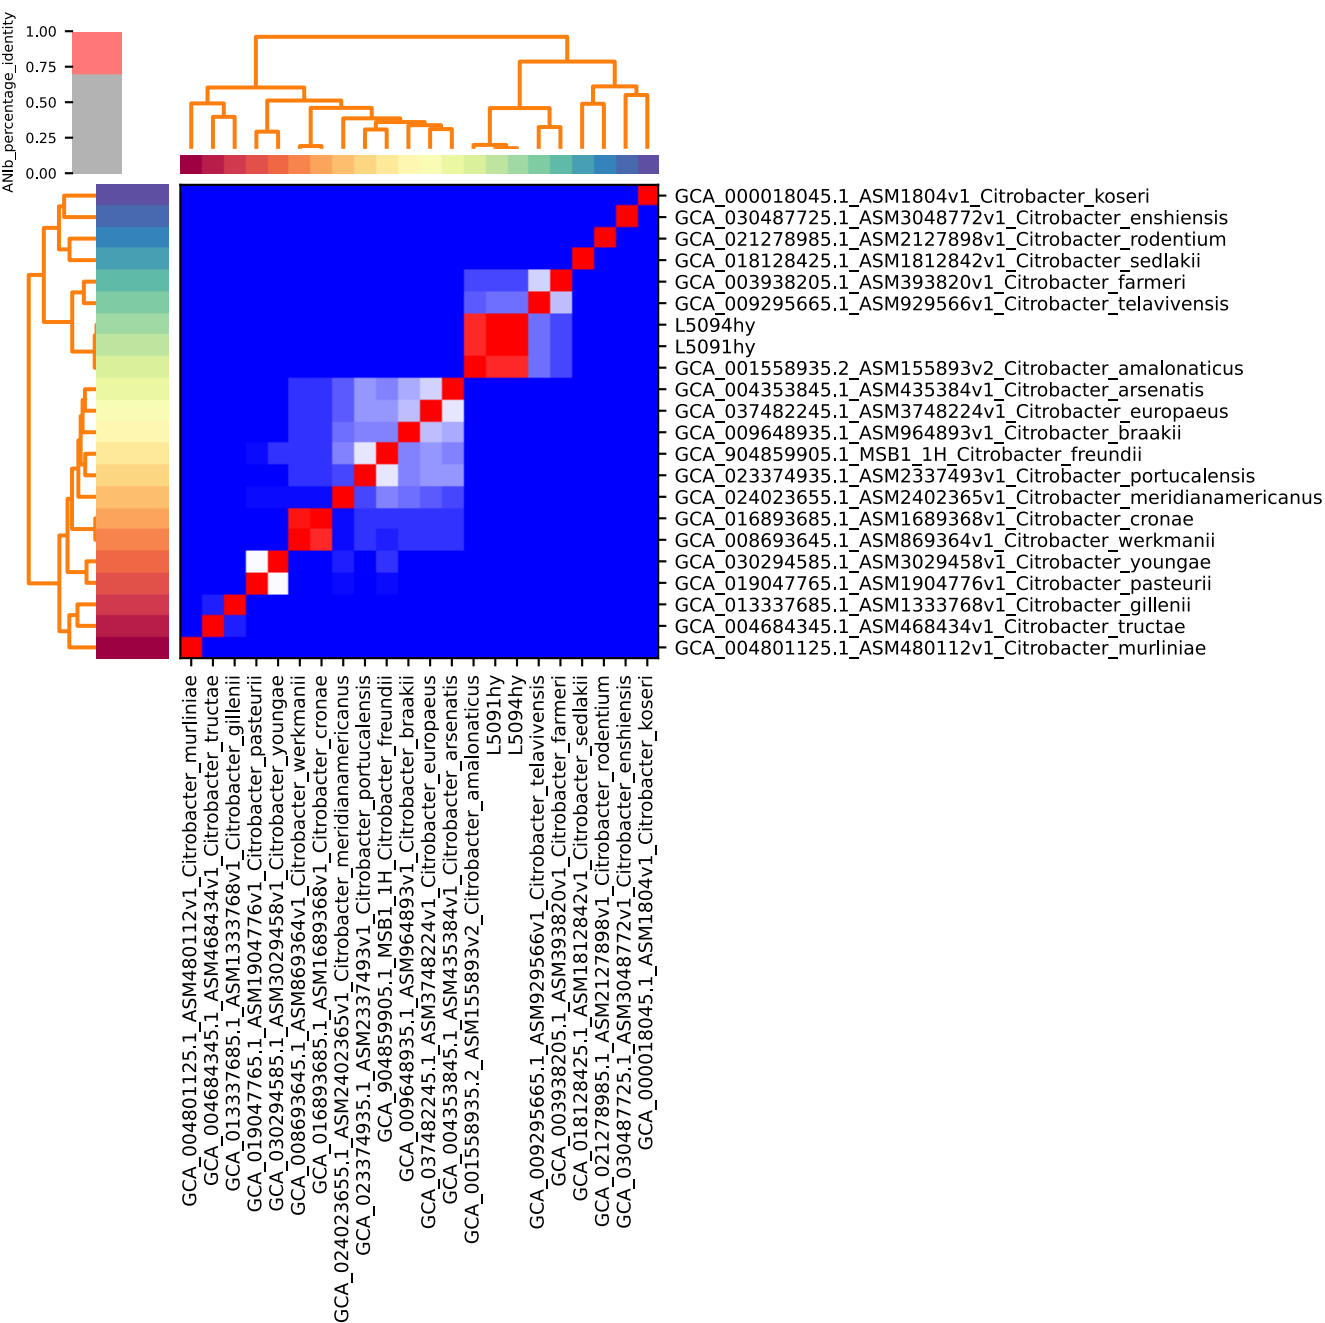

Figure S1. Average nucleotide identity analysis of two *C. amalonaticus* isolates (L5091hy and L5094hy) and type strains of the genus *Citrobacter*.
